# Supplementary material for: IL-1β-driven amyloid plaque clearance is associated with an expansion of transcriptionally reprogrammed microglia
Source: PubMed Central journal article supplement (PMC6902486; doi:10.1186/s12974-019-1645-7), 2019-12-10

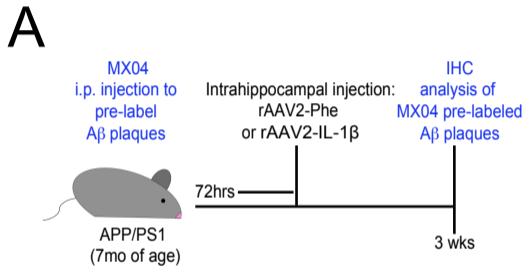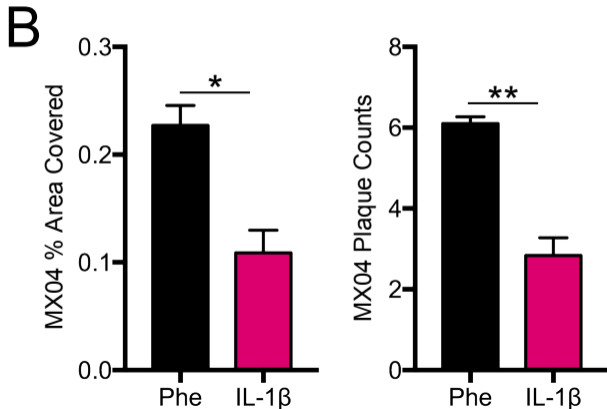

Supplement: 12974_2019_1645_MOESM2_ESM.pdf [file 12974_2019_1645_MOESM2_ESM.pdf]
